# Supplementary material for: Motoric Cognitive Risk Syndrome and Traffic Incidents in Older Drivers in Japan
Source: PubMed Central journal article supplement (PMC10457720; doi:10.1001/jamanetworkopen.2023.30475), 2023-08-25
Supplement: jamanetwopen-e2330475-s001.pdf [file jamanetwopen-e2330475-s001.pdf]

## Supplemental Online Content

Kurita S, Doi T, Harada K, et al. Motoric cognitive risk syndrome and traffic incidents in older drivers in Japan. *JAMA Netw Open*. 2023;6(8):e2330475. doi:10.1001/jamanetworkopen.2023.30475

**eTable.** Logistic Regression Model for the Associations of MCR Assessment Findings With Car Collisions Except Collisions That Were Less Than Half of Driver's Fault

**eFigure 1.** Comparison of Car Collisions Except Collisions That Were Less Than Half of Driver's Fault Among MCR Assessment Using  $\chi^2$  Test

**eFigure 2.** Comparison of Each Item of Near-Miss Traffic Incidents Among MCR Assessment Using  $\chi^2$  Test

**eFigure 3.** Odds Ratios of Interactions Between MCR Assessment Findings and OCI on the Associations With Car Collisions Except Those That Were Less Than Half of Driver's Fault

This supplemental material has been provided by the authors to give readers additional information about their work.

**eTable.** Logistic Regression Model for the Associations of MCR Assessment Findings With Car Collisions Except Collisions That Were Less Than Half of Driver's Fault

|                                                                  | Traffic violent         |                  |                         |                  |
|------------------------------------------------------------------|-------------------------|------------------|-------------------------|------------------|
|                                                                  | Crude                   |                  | Adjusted                |                  |
|                                                                  | OR (95% CI)             | p                | OR (95% CI)             | p                |
| MCR assessment (ref: robust)                                     |                         |                  |                         |                  |
| Only SMC                                                         | <b>1.84 (1.54–2.19)</b> | <b>&lt;0.001</b> | <b>1.71 (1.43–2.04)</b> | <b>&lt;0.001</b> |
| Only slow gait                                                   | 1.33 (0.91–1.96)        | 0.142            | 1.27 (0.87–1.88)        | 0.218            |
| MCR                                                              | <b>2.30 (1.80–2.94)</b> | <b>&lt;0.001</b> | <b>2.06 (1.60–2.65)</b> | <b>&lt;0.001</b> |
| Age                                                              |                         |                  | 0.99 (0.98–1.01)        | 0.491            |
| Sex (ref: Female)                                                |                         |                  | 0.91 (0.78–1.05)        | 0.202            |
| Educational year                                                 |                         |                  | 1.04 (1.01–1.07)        | 0.015            |
| Eye diseases (ref: No)                                           |                         |                  | 1.12 (0.96–1.30)        | 0.142            |
| Hearing difficulty (ref: No)                                     |                         |                  |                         |                  |
| Sometimes                                                        |                         |                  | 1.22 (1.04–1.42)        | 0.015            |
| Yes                                                              |                         |                  | 1.40 (1.16–1.69)        | 0.001            |
| Medication use (ref: <5)                                         |                         |                  | 1.21 (1.02–1.43)        | 0.028            |
| Sleep duration (ref: ≥7 hr)                                      |                         |                  |                         |                  |
| 6.1–6.9 hr                                                       |                         |                  | 1.23 (1.04–1.45)        | 0.013            |
| <6 hr                                                            |                         |                  | 1.45 (1.21–1.73)        | <0.001           |
| Excessive daytime sleepiness<br>(ref: Less than a day in a week) |                         |                  | 1.27 (1.06–1.52)        | 0.009            |
| Driving time                                                     |                         |                  | 1.002 (1.001–1.003)     | <0.001           |
| Cognitive impairment (ref: No)                                   |                         |                  | 1.08 (0.92–1.28)        | 0.345            |

MCR, motoric cognitive risk syndrome; OR, odds ratio; ref, reference; SMC, subjective memory complaints

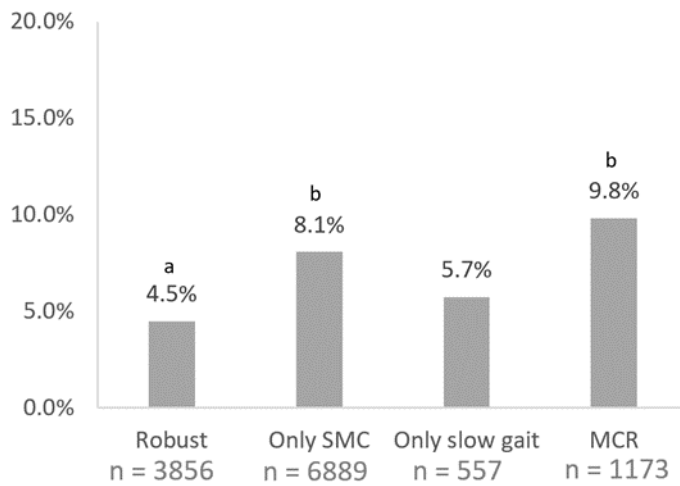

**eFigure 1.** Comparison of Car Collisions Except Collisions That Were Less Than Half of Driver’s Fault Among MCR Assessment Using  $\chi^2$  Test

<sup>a</sup> Adjusted standardized residual was > 1.96 (p < 0.05).

<sup>b</sup> Adjusted standardized residual was < -1.96 (p < 0.05).

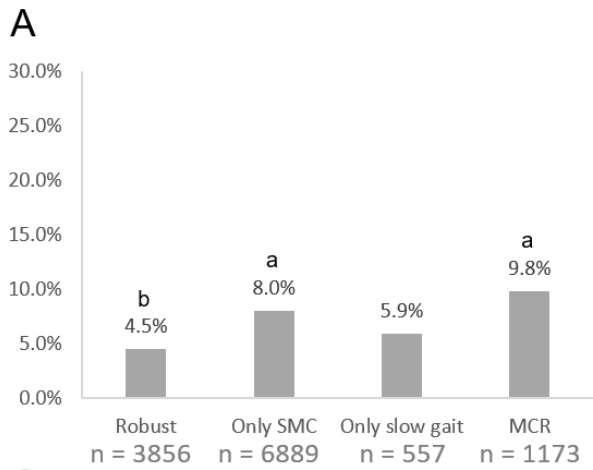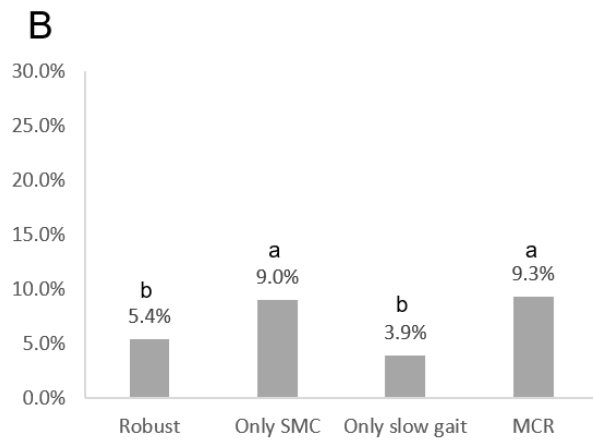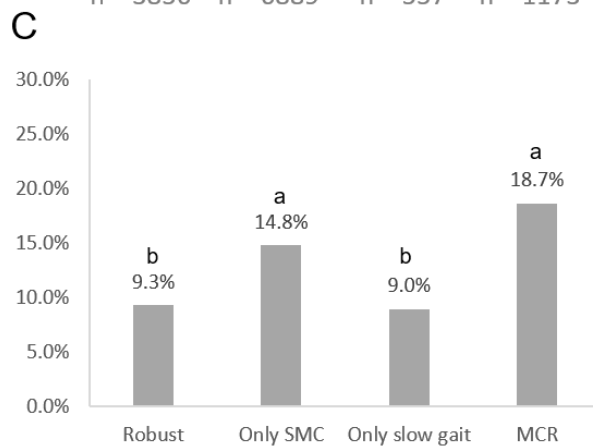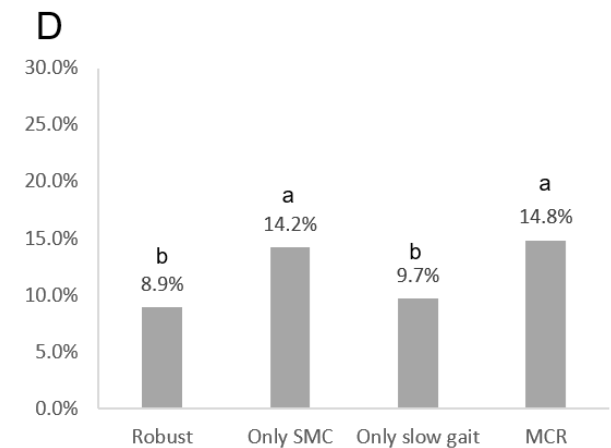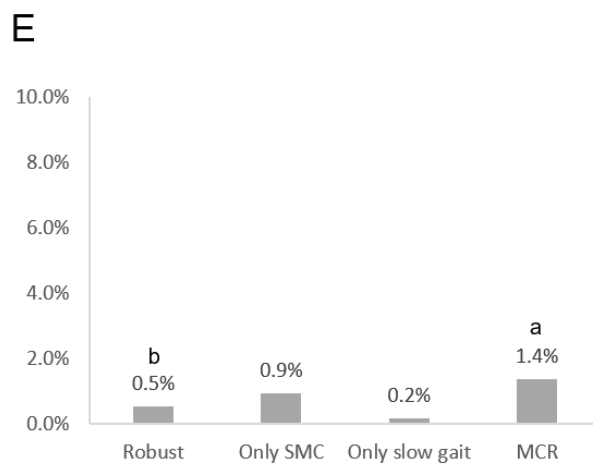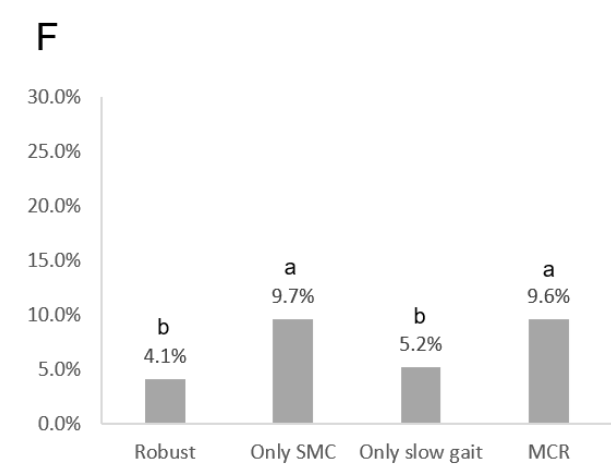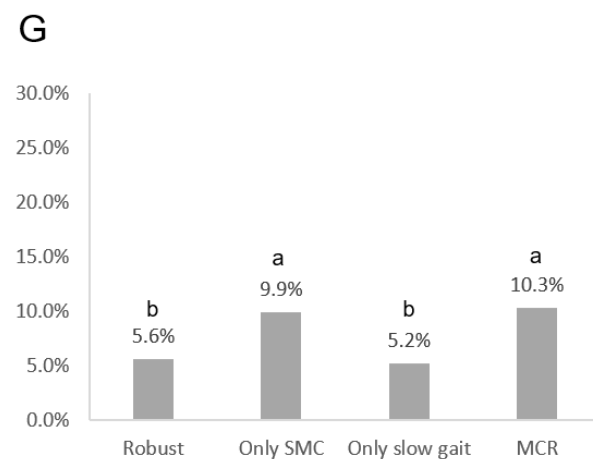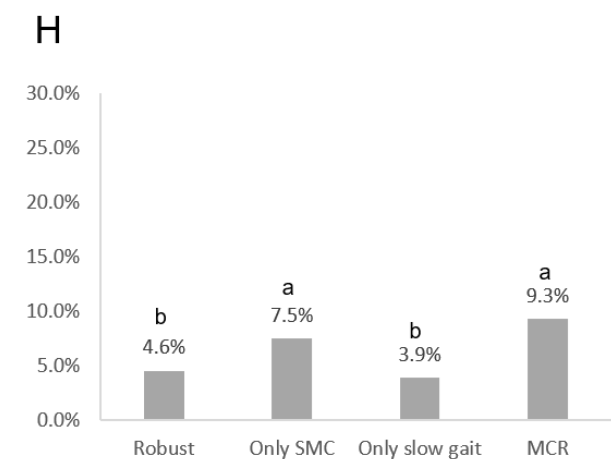

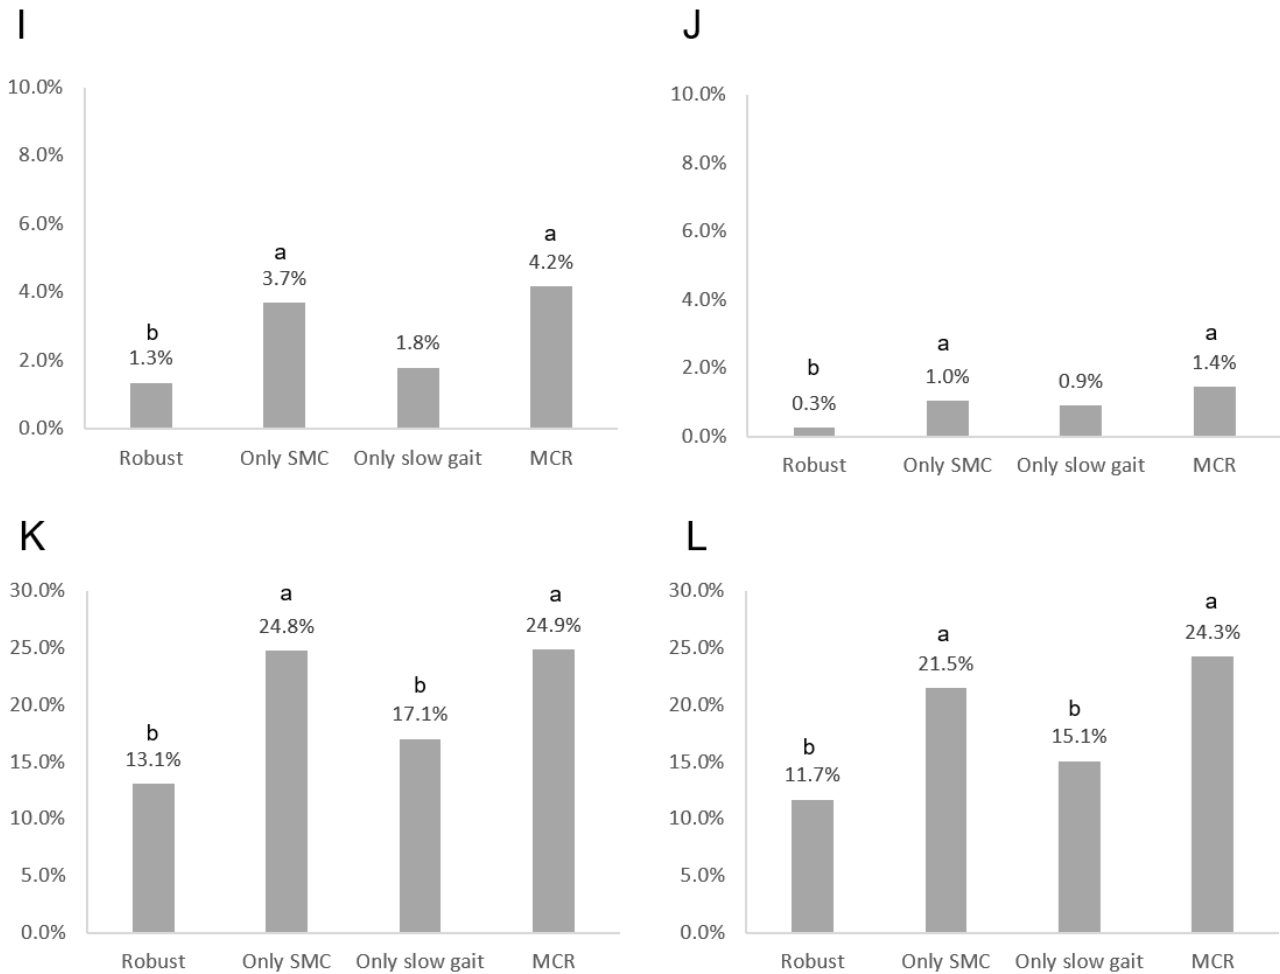

- A) When going from a stop line, I almost hit someone coming from a different direction.
- B) When attempting to turn right, I almost hit a car coming straight on.
- C) When attempting to turn right, I almost hit a pedestrian or bicycle.
- D) When attempting to turn left, I almost hit a pedestrian or bicycle.
- E) I drifted greatly into the oncoming lane and almost collided head-on with another vehicle.
- F) When changing lanes, I almost collided with another vehicle.
- G) I almost collided with a vehicle in front of me.
- H) I almost struck a bicycle, motorcycle, other vehicle I was overtaking or passing.
- I) I made a mistake while stepping on the accelerator or brake.
- J) When starting on a hill, I almost hit another vehicle or obstacle (including living things).
- K) When backing up to park, I almost hit another vehicle or obstacle (including living things).
- L) When I entered a store parking lot from the road, I almost ran up on the curb of the sidewalk.

**eFigure 2.** Comparison of Each Item of Near-Miss Traffic Incidents Among MCR Assessment Using  $\chi^2$  Test

<sup>a</sup> Adjusted standardized residual was  $> 1.96$  ( $p < 0.05$ ).

<sup>b</sup> Adjusted standardized residual was  $< -1.96$  ( $p < 0.05$ ).

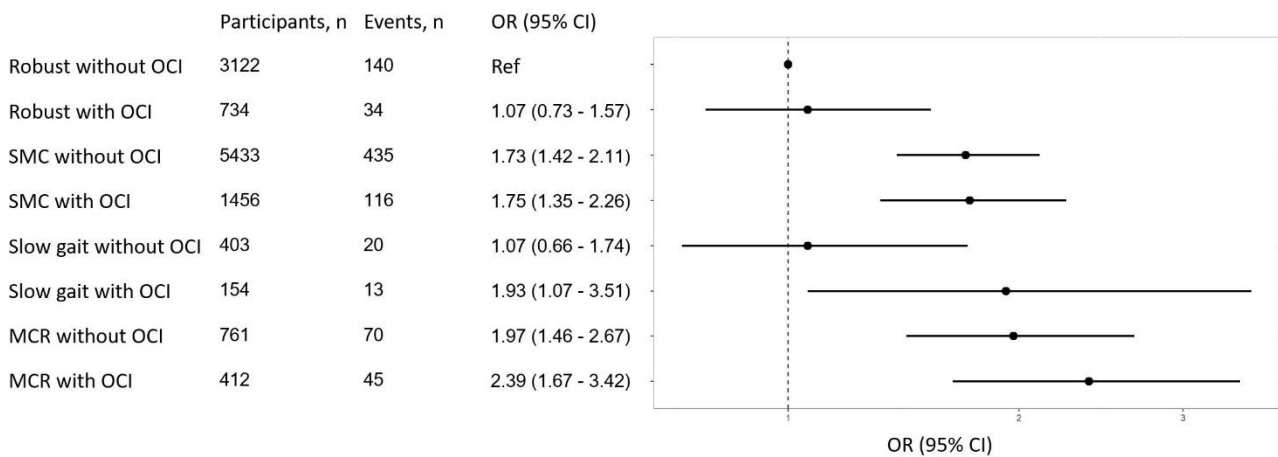

**eFigure 3.** Odds Ratios of Interactions Between MCR Assessment Findings and OCI on the Associations With Car Collisions Except Those That Were Less Than Half of Driver’s Fault

SMC, subjective memory complaints; MCR, motoric cognitive risk syndrome; OCI, objective cognitive impairment

Adjusted for age, sex, educational year, eye diseases, hearing difficulty, medication use, sleep duration, excessive daytime sleepiness, and driving time.
