# Supplementary material for: Motoric Cognitive Risk Syndrome and Traffic Incidents in Older Drivers in Japan
Source: PubMed Central journal article supplement (PMC10457720; doi:10.1001/jamanetworkopen.2023.30475), 2023-08-25
Supplement: jamanetwopen-e2330475-s002.pdf [file jamanetwopen-e2330475-s002.pdf]

## Data Sharing Statement

Kurita. Motoric Cognitive Risk Syndrome and Traffic Incidents in Older Drivers in Japan. *JAMA Netw Open*. Published August 25, 2023. doi:10.1001/jamanetworkopen.2023.30475

### Data

**Data available:** No

### Additional Information

**Explanation for why data not available:** The datasets used and/or analyzed during the present study are available from the corresponding author on reasonable request.
